# Supplementary material for: Effect of high-dose dexamethasone on perioperative lactate levels and glucose control: a randomized controlled trial
Source: Springer Nature journal article supplement (doi:10.1186/s13054-015-0736-9), 2015-02-02
Supplement: MOESM1 [file 9780082]

# **Effect of high-dose dexamethasone on perioperative lactate levels and glucose control: a randomized controlled trial.**

**Additional Figures and Tables**

**Additional Figure 1: Lactate (a) and glucose (b) sampling frequency and number of insulin infusion rate readjustments (c) in the first 15 hours of postoperative ICU stay.**

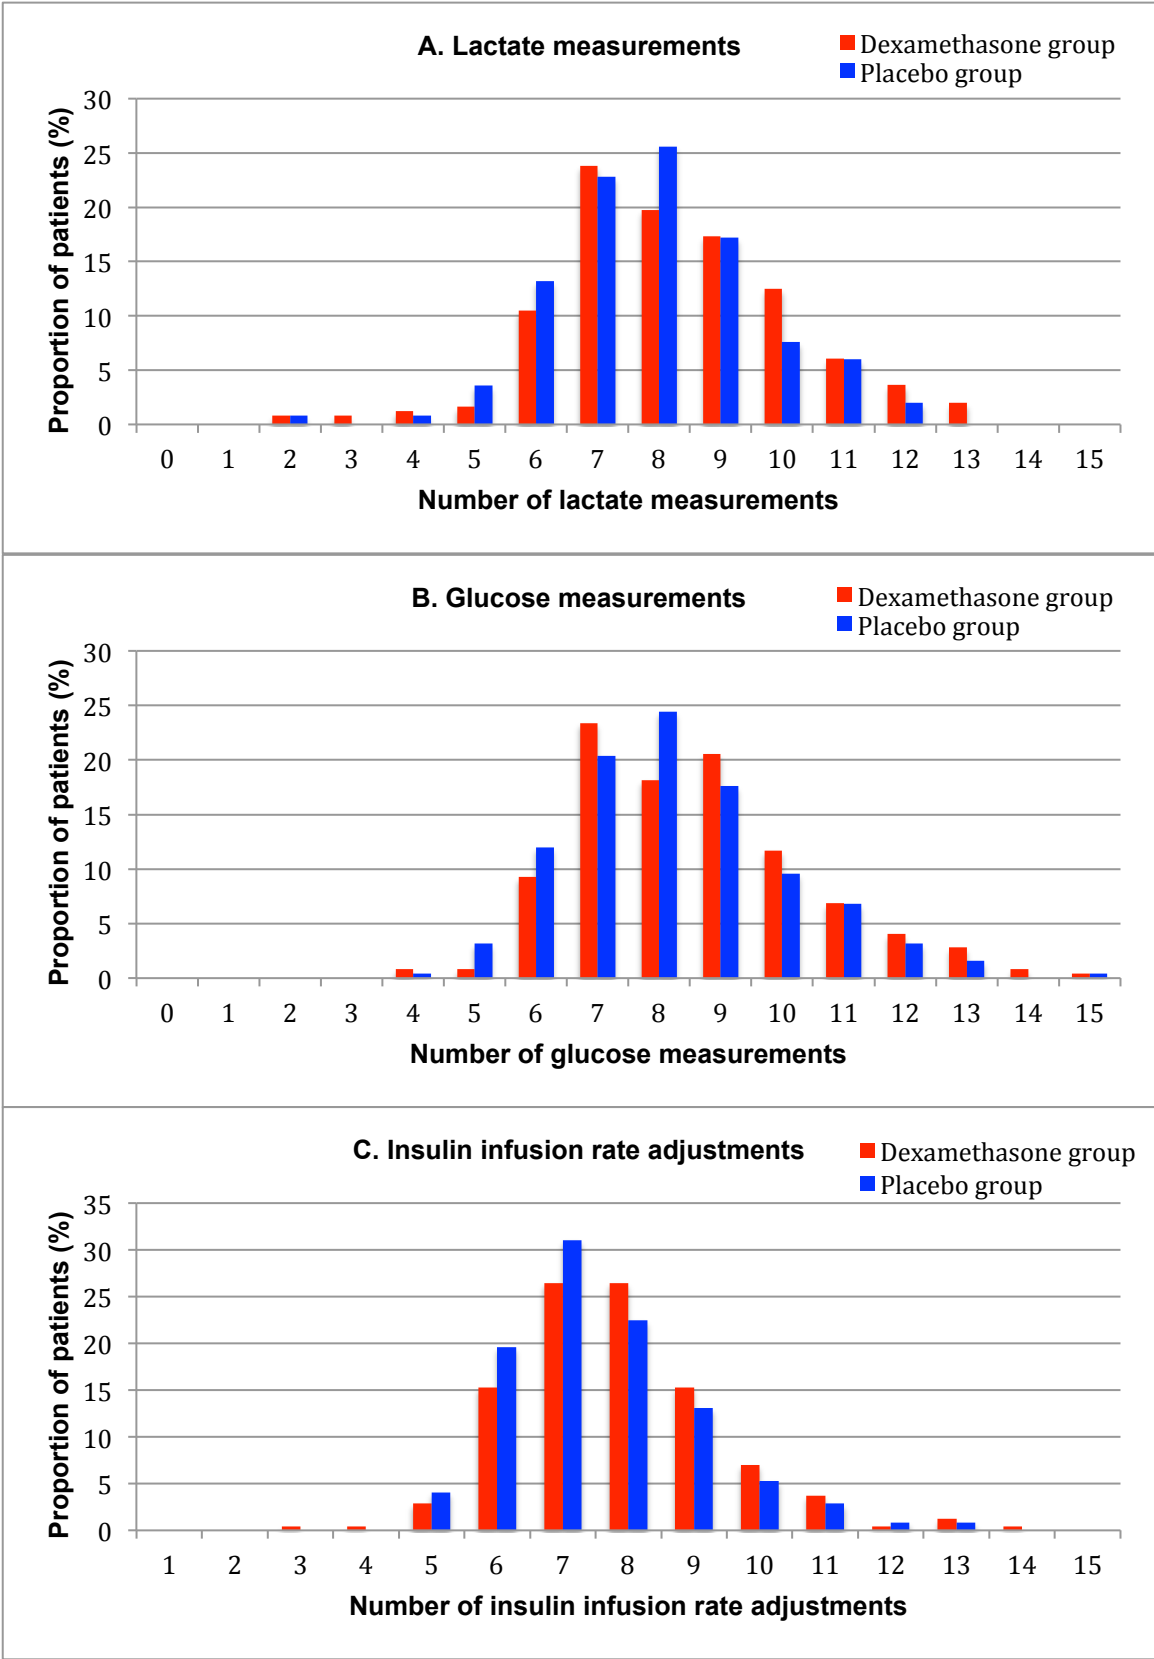

**Additional Figure 2: Individual measurements of glucose, lactate and insulin infusion rate in the dexamethasone and placebo groups.**

Time course of glucose in placebo group

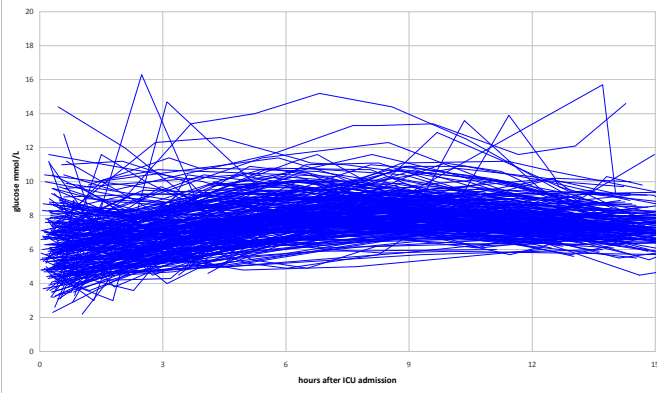

Time course of glucose in dextrose group

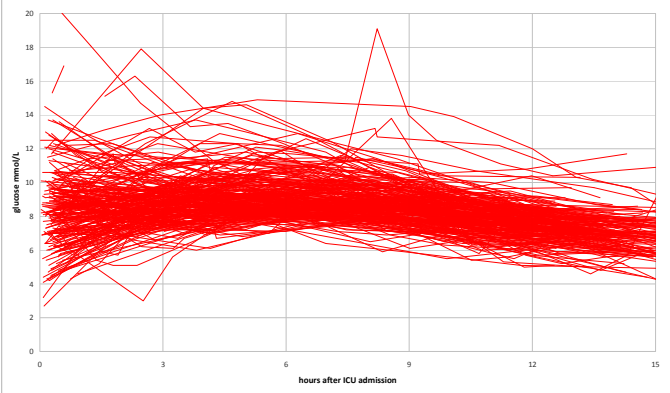

Time course of lactate in placebo group

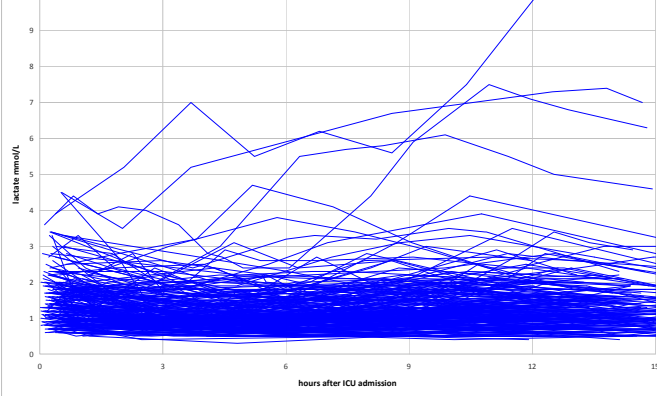

Time course of lactate in dextrose group

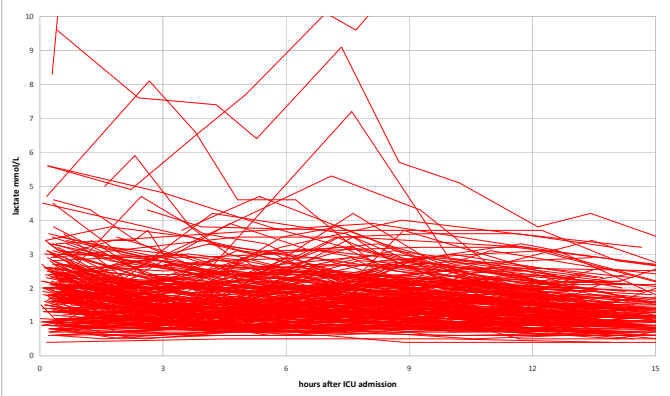

Time course of insulin dose in placebo group

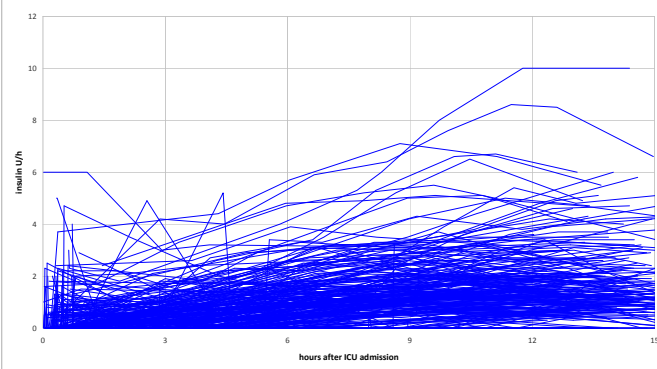

Time course of insulin dose in dextrose group

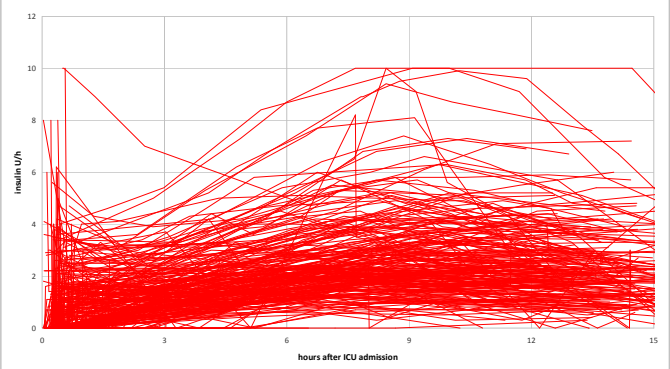

| <b>Additional Table 1: Multivariate linear regression model of the effect of dexamethasone on postoperative lactate levels</b>              |                                        |                |                                        |                |
|---------------------------------------------------------------------------------------------------------------------------------------------|----------------------------------------|----------------|----------------------------------------|----------------|
|                                                                                                                                             | <b>Model 1<br/>R<sup>2</sup>=0.055</b> |                | <b>Model 2<br/>R<sup>2</sup>=0.216</b> |                |
|                                                                                                                                             | <b>Beta</b>                            | <b>P-value</b> | <b>Beta</b>                            | <b>P-value</b> |
| Treatment allocation (to dexamethasone or placebo)                                                                                          | 52.711                                 | <.001          | 12.454                                 | 0.208          |
| Glucose area under the curve in the first 15 hours of postoperative ICU stay (AUC <sub>15</sub> ), in mg/dL x h                             |                                        |                | 0.187                                  | <.001          |
| Model dependent variable is lactate area under the curve in the first 15 hours of postoperative ICU stay (AUC <sub>15</sub> ), in mg/dL x h |                                        |                |                                        |                |



**eTable 2 (continued). Bivariate cross-correlation matrix of glucose and lactate levels in the first 15 hours of postoperative ICU stay.**

|           |   |      |       |       |       |       |       |       |       |       |       |      |       |       |      |       |       |
|-----------|---|------|-------|-------|-------|-------|-------|-------|-------|-------|-------|------|-------|-------|------|-------|-------|
| <b>15</b> | R | ,063 | 0,121 | 0,153 | 0,216 | 0,267 | 0,289 | 0,321 | 0,352 | 0,348 | 0,359 | 0,36 | 0,353 | 0,336 | 0,28 | 0,242 | 0,169 |
|           | P | ,199 | ,013  | ,002  | ,000  | ,000  | ,000  | ,000  | ,000  | ,000  | ,000  | ,000 | ,000  | ,000  | ,000 | ,000  | ,000  |

Abbreviations: R denotes correlation coefficient, P: P-value.
